# Supplementary material
Source: Springer Nature journal article supplement (https://www.springermedizin.de/resource/supplementary/12936_2009_1115_MOESM2_ESM.pdf/9549768)
Supplement: MOESM2 [file 9549768]

**3183 Screened  
Cameroon**

**Garoua 998 screened**

**Mutengene 1094 screened**

**Yaounde 1091  
Screened**

**758  
Excluded**

**834  
Excluded**

**832  
Excluded**

**240 Recruited**

**260 Recruited**

**260 Recruited**

**AQ  
80**

**AQSP  
80**

**SP  
80**

**AQ  
87**

**AQSP  
86**

**SP  
87**

**AQ  
86**

**AQSP  
86**

**SP  
88**

**(D14) 10 lost  
70 outcomes**

**(D14) 6 lost  
74 outcomes**

**(D14) 3 lost  
77 outcomes**

**(D14) 3 lost  
84 outcomes**

**(D14) 3 lost  
83 outcomes**

**(D14) 10 lost  
77 outcomes**

**(D14) 7 lost  
79 outcomes**

**(D14) 3 lost  
83 outcomes**

**(D14) 1 lost  
87 outcomes**

**(D28) 1 lost  
69 outcomes**

**(D28) 3 lost  
71 outcomes**

**(D28) 3 lost  
74 outcomes**

**(D28) 2 lost  
82 outcomes**

**(D28) 0 lost  
83 outcomes**

**(D28) 0 lost  
77 outcomes**

**(D28) 2 lost  
77 outcomes**

**(D28) 3 lost  
80 outcomes**

**(D28) 1 lost  
86 outcomes**
